# Supplementary material for: Dispatch from the field: ecology of ground-web-building spiders with description of a new species (Araneae, Symphytognathidae)
Source: Biodivers Data J. 2014 Mar 26;(2):e1076. doi: 10.3897/BDJ.2.e1076 (PMC4031436; doi:10.3897/BDJ.2.e1076)
Supplement: Supplementary material 1 — Spider morphospecies sampled from riparian forest, riverine forest, and oil palm plantation [file biodiversity_data_journal-2-e1076-s001.xls]

## Sheet: Sheet7
	Riparian forest		Riverine forest		Oil palm plantation
Morphospecies	Botanical plot 1 (n = 6)	Botanical plot 4 (n = 4)	Botanical plot 2 (n = 6)	Botanical plot 3 (n = 4)	(n = 8)
Crassignatha danaugirangensis	31	7	0	0	0
Hahniidae sp. 1	7	0	0	0	0
Linyphiidae sp. 1	0	2	3	0	0
Linyphiidae sp. 2	0	2	2	0	0
Linyphiidae sp. 3	0	0	0	0	5
Linyphiidae sp. 4	0	0	0	0	2
Linyphiidae sp. 5	0	0	0	1	0
Linyphiidae sp. 6	0	0	0	2	0
Mysmenidae sp. 1	0	0	3	1	0
Mysmenidae sp. 2	0	0	1	0	0
Mysmenidae sp. 3	0	0	0	0	4
Telemidae? sp. 1	1	0	0	0	0
Uloboridae sp. 1	0	0	0	0	2
Theridiosomatidae Zoma sp. 1	0	2	0	0	1
